## Sympathetic and parasympathetic involvement in time constrained sequential foraging

Neil M. Dundon<sup>a,b</sup>, Neil Garrett<sup>c,d</sup>, Viktoriya Babenko<sup>a</sup>, Matt Cieslak<sup>e</sup>, Nathaniel D. Daw<sup>c</sup>,

Scott T. Grafton<sup>a</sup>,

<sup>a</sup> Department of Psychological and Brain Sciences, University of California, Santa Barbara, Santa Barbara, CA

<sup>b</sup> Department of Child and Adolescent Psychiatry, Psychotherapy and Psychosomatics, University of Freiburg, Freiburg, Germany

<sup>c</sup> Princeton Neuroscience Institute, Princeton University, Princeton, NJ

<sup>d</sup> Department of Experimental Psychology, University of Oxford, Oxford, UK

<sup>e</sup> Perelman School of Medicine, University of Pennsylvania, Philadelphia, PA

Corresponding author: Scott T. Grafton (stgraffon@ucsb.edu)

## Abstract

Appraising sequential offers relative to an unknown future opportunity and a time cost requires an optimization policy that draws on a learned estimate of an environment's richness. Converging evidence points to a learning asymmetry, whereby estimates of this richness update with a bias toward integrating positive information. We replicate this bias in a sequential foraging (prey selection) task and probe associated activation within two branches of the autonomic system, sympathetic and parasympathetic branches, using simultaneous cardiac autonomic physiology. In general, lower value offers were accepted during periods of autonomic drive, both in the sympathetic (shorter pre-ejection period PEP) and parasympathetic (higher HF HRV) branches. In addition, we reveal a unique adaptive role for the sympathetic branch in learning. It was specifically associated with adaptation to a deteriorating environment: it correlated with both the rate of negative information integration in belief estimates and downward changes in moment-to-moment environmental richness, and was predictive of optimal performance on the task. The findings are consistent with a parallel processing framework whereby autonomic function serves both learning and executive demands of prey selection.

## Introduction

A specific but nonetheless ubiquitous dilemma that occurs with value-based decisions requires people to approach or avoid sequential offers that pit a reward against an opportunity cost of time, without full knowledge of what offers, if any, may follow. For example, by committing to a specific project, a contract worker receives a monetary payment (reward) while eschewing alternative projects during project completion (opportunity time cost), without knowing what alternative options will emerge post commitment.

Inspired by animal ethology and optimal foraging theory, the Marginal Value Theorem (MVT; (Charnov, 1976) offers an optimality rule for sequential decisions of this nature. Behaviour is optimised by approaching yields that exceed the average reward-rate (richness) of an environment and avoiding yields that fall below it. The environment and its consequential opportunity cost thus prescribe the selectivity of choices; e.g., contract workers should only accept high yield projects during a construction boom (wiring a new supermarket) but accept low yield projects during a construction downturn (fixing a faulty domestic appliance). The boom presents a high opportunity cost, i.e., higher yields sacrificed when committing to a specific project, relative to the low opportunity cost during the downturn. Accordingly, studies across various species (Cowie, 1977; McNamara & Houston, 1985), including humans (Hayden, Pearson & Platt, 2011; Kolling, Behrens, Mars & Rushworth, 2012), have predicted foraging behaviour using MVT inspired models.

Learning the nature of the environment presents a computational challenge. In addition, contexts like the boom and downturn examples above rarely remain in steady-state, further requiring perturbation-driven behaviour adjustments. Recent work in humans resolves both issues, by demonstrating that sequential choice behaviour is best captured by an MVT inspired learning model (Constantino & Daw, 2015; Garrett & Daw, 2019; Lenow, Constantino, Daw & Phelps, 2017). Specifically, the decision to depart one patch of potential resources to harvest in another during a dynamic patch foraging task is predicated on a leave threshold, defined as the harvest sacrificed when leaving. The threshold adheres to an optimality policy that compares harvests against fluctuating environmental richness (i.e., the average starting yield of iteratively depleting patches) which are learned via a standard delta rule (Constantino & Daw, 2015; Lenow et al., 2017). Garrett and Daw (2019) later extended the application of MVT learning models to a prey selection task, and demonstrated that sequential capture behaviour also adheres to trialwise appraisal of prey quality relative to learned beliefs about fluctuating environmental richness (i.e., the concentration of hi or low quality prey). This later work further demonstrated that beliefs about the environmental richness update with asymmetric bias, that is, improvements ( $\delta > 0$ ) are learned at a higher rate than deteriorations ( $\delta < 0$ ); the ‘naïve perseverance of optimism’.

One important next step in understanding the physiology that underlies foraging behaviour is characterising the forager's stress state associated with these emergent learning mechanisms. Dynamic changes of their stress state may serve as an implicit indicator of their appraisal of the environment and could potentially telegraph learning dependent shifts in selection criteria. At present only one study has indirectly explored the relationship of stress related endocrine activity and foraging behaviour by linking both acute and chronic stress elevation to overharvesting

tendencies in a patch foraging task (Lenow et al., 2017). However, the main assays in that study (cortisol and self-report) probed stress fluctuations operating on longer time horizons than the time scales associated with faster acting learning needed to update beliefs about environmental richness. Commonly used alternative assays of putative stress states include pupillometry or autonomic sympathetic tone via measures of galvanic skin conductance. Pupil size is mediated by noradrenergic neurons of the brainstem locus coeruleus and dynamically fluctuates both spontaneously and in response to a variety of external stimuli (Joshi, Li, Kalwani & Gold, 2016). Connections with other brainstem and cortical regions provide a pathway for surprising stimuli to drive arousal rather than stress specific stimuli (Krishnamurthy, Nassar, Sarode & Gold, 2017). Galvanic skin responses also suffer from a protracted response profile, limiting their ability to link sympathetic stress responses on fast time scales (Bradley, Miccoli, Escrig & Lang, 2008). More promising approaches have recently emerged in cardiac autonomic physiology, which have yet to be employed with sequential decision-making tasks. Such approaches have nonetheless charted the effects of experimentally manipulated reward and difficulty on summary states of the sympathetic branch of the autonomic system, indexed with aggregated measures of beta-adrenergic myocardial mobilization (reviewed in (Richter, Gendolla & Wright, 2016). Of relevance to sequential decision-making, increased sympathetic states are associated with the difficulty of cognitive tasks and the relevance of reward – i.e., contractility increases with both increased difficulty and increased importance of reward (Richter, Friedrich & Gendolla, 2008; Kuipers et al., 2017). Further, where task difficulty is either unknown (Richter & Gendolla, 2009) or user-defined (Wright, Killebrew & Pimpalpure, 2002), (mirroring the situation presented by sequential decisions), sympathetic states uniquely track reward relevance, suggesting they may be

involved with learning the opportunity cost of a reward state. However such a conclusion requires linking autonomic and reward state fluctuations over shorter time-scales.

Specific advances within cardiac analyses now allow several approaches for trial-wise capture of the separate sympathetic and parasympathetic contributions of the autonomic state. These include point-wise estimates of low and high frequency heart rate variability (HF HRV), with the former reflecting a complex mixture of sympathetic and parasympathetic tone (Saul et al., 1991) and the latter serving as a proxy of parasympathetic cardiac tone (Barbieri, Matten, Alabi & Brown, 2005). A more direct measure of cardiac sympathetic tone can be obtained from impedance cardiography and state of the art signal processing (Cieslak et al., 2018). In the present paper, we employ these techniques on continuous cardiac data - electrocardiogram (ECG) and impedance cardiogram (ICG) - recorded while subjects performed a prey selection task. Together, HF HRV and ICG offer a temporally refined window into dynamic changes of autonomic mediated allostatic stress responses during trial-wise learning driven by perturbations in environmental richness. With this we first replicate behavioral results showing a belief updating asymmetry, first reported in Garrett and Daw (2019). We then demonstrate that autonomic drive in both the sympathetic and parasympathetic systems align with capture of lower value items, whether value is considered objectively, or relative to the environment's richness at a given moment. A unique contribution from the sympathetic branch to the autonomic state then emerged with learning. First, sympathetic mobilization was uniquely associated with perturbations in environmental richness, i.e., tracking negative derivatives in the moment-to-moment rates of captured reward. In addition, computational models of choice behavior revealed that during periods of sympathetic drive, subjects were faster at learning a deterioration in the environment's richness, allaying the known

positive biases they might have in integrating this negative information. Finally, we demonstrate that sympathetic – but not parasympathetic – engagement in crucial learning periods of the task predict overall optimal performance.

## Methods

### *Participants*

We recruited twenty subjects via word of mouth. Nine subjects were male and had a mean (standard deviation) age of 19.11 (1.37) while the remaining eleven female subjects had a mean (standard deviation) age of 20 (2.18). Total mean (standard deviation) age of our sample (N=20) was 19.65 (2.18). Two male subjects and one female subject reported themselves left-handed. All subjects provided informed consent to participate and experimental procedures were carried out following IRB approval from the University of California, Santa Barbara.

### *Task*

Subjects spent 24 minutes playing the Prey Selection task (Garrett & Daw, 2019); a computerized video game emulating a formal sequential foraging task under a time constraint (see Fig. 1A-C). Subjects were pilots of a space ship and instructed to harvest as much fuel as possible to earn a bonus (\$0.01 per point). Fuel was harvested by capturing sequentially approaching space-invaders. Invaders carried either a high (80 points) or low (30 points) fuel reward, and a high (8s) or low (3s) capture cost. The four identities (see Fig. 1B) mapped onto a three-tier profitability rank: high (high reward / low cost); mid (high reward / high cost, or low reward / low cost); and low (low reward / high cost). Participants spent half of the game-time foraging in an environment with a

disproportionately high concentration of high profit invaders (boom; high:mid:low = 4:2:1) and the other half in an environment with a disproportionately high concentration of low profit invaders (downturn; high:mid:low = 1:2:4) (see Fig. 1C). The two environments had different background colours, and subjects were informed that they would differ in terms of invader concentrations, but not explicitly how. Half of the subjects foraged in the order boom to downturn (BD) and the other half in the order downturn to boom (DB), with an opportunity to rest in-between the two environments.

Subjects performed the Prey Selection task seated 150cm from a 68.6cm (diameter) computer monitor and registered responses on a standard PC keyboard. Experimental stimuli were presented on a Mac mini computer, using Psychtoolbox extensions (Brainard, 1997; Pelli, 1997; Kleiner, Brainard & Pelli, 2007) in MATLAB v9.4 (MATLAB, 2018a).

The task paradigm is described in Figure 1A. At all times subjects saw a cockpit with two target boxes, one on the left and one on the right of the screen. On each trial, subjects had two seconds to decide if they wished to capture or release an invader approaching their cockpit. Invaders would pseudo randomly approach one of the two target boxes. Captures were registered by holding the response button corresponding to the target box in the path of incoming invader (z with left index finger for the box on the left, m with right index finger for the box on the right). Subjects were required to keep the response button held as the invader finished its two second approach to the box, and thereafter for the entirety of the capture time (2s or 7s). Following a successful capture, a feedback screen (1s) described the harvested reward, during which subjects could release the response button. After the feedback screen the next invader immediately began its approach.



Releases were registered by holding the response button corresponding to the response box opposite the incoming invader. Subjects were required to hold the response button until the invader reached the capture box. The invader would then disappear and the next invader would begin its approach. Errors carried an 8s time penalty, during which the response boxes disappeared and no invaders approached. Errors were (i) failing to register any response during the 2s invader approach; (ii) releasing the response button before the invader reached the response box (captures and avoids); (iii) releasing the response button before the end of the capture cost (captures only). To encourage full exploration of each environment, 25% of trials were forced-choice. On these trials, a red asterisk would appear above one of the two capture boxes, and participants were instructed to press this response button regardless of whether they wished to perform the corresponding capture or release. Error and forced-choice trials were excluded from later analyses. Participants received a standardised set of instructions, performed a two-minute block of practice trials and required a perfect score on a questionnaire probing task comprehension before starting the task.

### *Physiological recording and preprocessing*

Physiological measures of ICG and ECG were collected using non-invasive approaches with a total of ten EL500 electrodes. Prior to each electrode placement, an exfoliation procedure was performed on each electrode location to maximise signal quality. An approximate one-inch area of skin was cleaned with an abrasive pad, followed by exfoliation with NuPrep gel (ELPREP, BIOPAC). Once the skin area was fanned dry, a small amount of BIOPAC GEL100 was placed on the electrode and on the skin. In order to assess ICG, a total of eight of the ten electrodes were placed on the neck and torso: two on each side of the neck and two on each side of the torso

(Bernstein, 1986). ECG recordings were obtained with a total of two sensors placed beneath the right collarbone and just below the left ribcage. The ICG electrodes provided the necessary ground. Continuous ECG was collected using an ECG100C amplifier and continuous ICG using a NICO100C amplifier (both from BIOPAC). Data were integrated using an MP150, system (BIOPAC) and displayed and stored using AcqKnowledge software version 4.3 (BIOPAC).

We extracted three estimates of the physiological state at each heartbeat – heart rate (HR), pre-ejection period (PEP) and high frequency heart rate variability (HF HRV). Semi-automated software MEAP labeled the continuous ECG and ICG (Cieslak et al., 2018). For each heartbeat, the ECG R point serves as the  $t=0$  landmark for within-heartbeat events. We next converted the continuous ICG (thoracic impedance ( $z$ )) to its derivative  $\frac{dz}{dt}$ , to facilitate the identification of key impedance inflection points required to estimate the pre-ejection period (PEP). This derivative time series was further corrected for concurrent respiratory activity; we first estimated the respiratory activity from the  $z$  timeseries and then applied a filter to  $\frac{dz}{dt}$  with a polort drift of one and high frequency cutoff of 0.35. The time interval between the ICG Q and B points defines the pre-ejection period (PEP) of a heartbeat, which is related to the contractility of the heart muscle before blood is ejected. However, due to difficulty in reliably capturing the relatively small Q point, PEP is often calculated as the difference between the easily detected R point and the B point (the RBI). This latter interval is comparable to PEP in reliability (Kelsey, Ornduff & Alpert, 2007; Kelsey et al., 1998) and validity (Kelsey et al., 1998; Mezzacappa, Kelsey & Katkin, 1999) and sometimes referred to as PEPr (Berntson, Lozano, Chen & Cacioppo, 2004). We used the RBI definition for our measure of PEP. Reduced values of PEP reflect a shorter pre-ejection interval, indicating increased sympathetic cardiovascular drive. However, to align PEP with the direction

of our other autonomic variables, allowing easier comparison from the results of later analyses, we negative signed (i.e., \*-1) all extracted values. For all subsequent references to PEP, higher values reflect increased sympathetic cardiovascular drive.

High frequency heart rate variability (HRV) was characterized with point process estimation software developed by Riccardo Barbieri and Luca Citi, executed as MATLAB code (available at <http://users.neurostat.mit.edu/barbieri/pphrv>). In brief, the code uses inverse Gaussian regression and spectral analysis of the latencies of ECG R points to generate a continuous estimation of HF HRV (Chen, Brown & Barbieri, 2007). We extracted the logarithmic transform of these estimations as a proxy of parasympathetic input to the heart, with higher values reflecting increases in this autonomic branch.

Finally, we used the reciprocal of R-R intervals as a measure of heart rate (HR), such that higher HR values reflect a decrease in the interval between R points, i.e., increased heart rate. HR was included in our analyses to control for a known cardiac effect where increased left-ventricular preload time (which occurs with slowing HR) can shorten PEP independent of sympathetic influences (Sherwood et al., 1990).

Trialwise estimates of the three physiological states were next derived by taking an average from all heartbeats during the two-second time window while invaders approached the spaceship on each trial. This provided trialwise estimates of the physiological states during a uniform length time window for all trials, regardless of the executed decision or the identity of the invader.

Finally, each trialwise physiology estimate was corrected for trialwise respiratory state. We performed this additional trialwise respiration correction to account for known influences of respiratory activity on heart rate and vagal tone (Larsen, Tzeng, Sin & Galletly, 2010), computed in our pipeline from raw ECG R points. We defined trialwise respiratory state as the average normalized product of the phase and magnitude of respiration activity (estimated from the z time series) at each R point during the two-second time window of invader approaches. Respiration corrected measures of each trialwise physiological state were the residuals from a linear model of each raw trialwise physiology state and the trialwise respiratory state, performed separately for each subject.

We will now present the methods and results separately for three separate branches of analyses. The first branch uses ANOVA and linear mixed effects models to explore the dynamics between physiological states, choices and objectively estimated measures of environmental richness and its moment-to-moment derivatives. The second analysis employs computationally modelled subjective estimates of the environment's richness; and compares models that allow the learning parameter to vary with physiological states. In the third and final analysis we test if blockwise changes in physiological state predict optimal task performance.

### *Analysis branch 1 - Methods*

All ANOVAs and trialwise mixed-effects models were fitted using lme4 (Bates et al., 2015) and lmerTest (Kuznetsova, Brockhoff & Christensen, 2017) packages in R. Unless otherwise specified, trialwise logistic models were fitted with logit link functions and Laplacian maximum likelihood approximation, while trialwise models of continuous measures used restricted maximum

likelihood approximation (REML). Also, unless otherwise specified, each trialwise mixed-effects model fitted a fixed effect for each specified coefficient, and an individual intercept for each subject. For both ANOVA and trialwise mixed-effects models, significant marginal effects of significant higher order interactions are not reported. Post-hoc ANOVA contrasts use Tukey correction. All other data pre-processing and analyses were conducted using MATLAB v9.4 (MATLAB, 2018a).

### *Analysis branch 1 - Results*

Our first behavioural analysis attempted to replicate the Garrett and Daw (2019) finding regarding asymmetric belief updating. To this end, we ran a three-way mixed ANOVA of mean capture-rate as a function of between-group factor *order* (RP, PR) and two repeated-measures factors *env* (boom, downturn) and *rank* (hi, intermediate, low). Summarised in Figure (1D), the ANOVA reported a significant three-way interaction between *order*, *env* and *rank* ( $F = 3.49, df = (2, 90), p = .035$ ). We accordingly contrasted mean capture rates between BD and DB, for the six levels of the *env\*rank* interaction. These contrasts demonstrated significantly higher capture of mid-rank invaders in the downturn environment for order DB, relative to BD ( $\mu = 0.828$  vs.  $\mu = 0.402$ , both  $s.e. = .050, p < 0.001$ ), with no other contrasts reaching statistical significance. In other words, foraging during the two order conditions differed only in terms of adjustments in the number of mid-rank captures in the downturn environment, in line with Garrett and Daw (2019), and suggestive of slower learning in the face of a contextual deterioration.

A corollary of asymmetric belief updating (prioritising positive information) is a decision threshold weighted preferentially toward recent reward over recent cost. To formally probe the

influence of current and recent offers on choice behaviour, we fitted a trialwise mixed-effects model of  $choice_t$  (capture, release) as a function of an intercept term and four parameters: reward and delay on a given trial  $t$  (respectively:  $reward_t, delay_t$ ) and reward and delay on the previous trial, i.e.,  $t - 1$  (respectively:  $reward_{t-1}, delay_{t-1}$ ). The model yielded a significant positive influence of  $reward_n$  ( $\beta = 2.20, s.e. = .071, p < .001$ ) and significant negative influence of  $delay_n$  ( $\beta = -2.19, s.e. = .073, p < .001$ ) on capture probability. Regarding recent offers, choice was only influenced by recent reward;  $reward_{t-1}$ : ( $\beta = -0.340, s.e. = .067, p < .001$ ),  $delay_{t-1}$ : ( $\beta = 0.062, s.e. = .067, p = .353$ ). The negative coefficient for  $reward_{t-1}$  is predicted by MVT; for example a high reward drives positive belief updating (of the environment's richness), increasing opportunity cost to future captures, and decreasing future acceptance. The specific influence of  $reward_{t-1}$  further supports the Garrett and Daw (2019) finding that positive information integrates more readily into state appropriate behavioural policy, relative to negative information.

We next assessed the influence of current physiological state on the relationship between current offer and choice behaviour. In three separate models, i.e., one each for PEP, HF HRV and HR, we ran a trialwise mixed-effects model of  $choice_t$  (capture, release) as a function of the two-way interaction effects  $physiology_t * reward_t$  and  $physiology_t * delay_t$ . We also included, in each model, an intercept term, and nuisance coefficients *order* (BD, DB), *env* (boom, downturn) and *trial index*. In line with the behaviour analyses above, each model showed the same influence of *order* and *state* on choice – higher capture rates in the downturn state, and for the DB order (all p-values < .004). Each model also returned a significant negative coefficient for *trial index* (all p-values < .001) reflecting higher capture rates early in foraging.

In addition, the PEP model returned a significant positive coefficient for the *physiology\*delay* effect ( $\beta = .548, s.e. = .147, p < .001$ ), suggesting that an increase in contractility (shorter PEP) blunts the negative association between delay and capture. The *physiology\*reward* did not reach statistical significance ( $\beta = -.241, s.e. = .148, p = .098$ ).

The HF model also returned a significant positive coefficient for the *physiology\*delay* effect ( $\beta = 1.09, s.e. = .145, p < .001$ ), suggesting that the negative association between delay and capture may be alleviated with increasing HF power (increased parasympathetic tone). In contrast to PEP, the *physiology\*reward* effect from the HF model was also significant ( $\beta = -1.29, s.e. = .144, p < .001$ ); the negative coefficient suggests the positive association between reward and capture also alleviates when HF power increases.

The HR model returned a significant negative coefficient for the *physiology\*delay* effect ( $\beta = -.892, s.e. = .168, p < .001$ ), and a significantly positive coefficient for the *physiology\*reward* effect ( $\beta = 1.14, s.e. = .169, p < .001$ ), suggesting that decreased heart rate blunts both the aversion of delay and the appeal of reward.

The findings from these preliminary models suggest that increases in both branches of the autonomic state (PEP and HF) are aligned with lower value acceptance, with PEP tuned more specifically to the cost dimension of value. HR, in contrast, decelerates during moments of low value capture. A shortcoming of these models, however, is that they do not consider value relative to the current rate of reward, i.e., environmental richness. Also, by running three separate models,

i.e., one each for the three different physiology variables, we cannot confirm if physiological associations with reward and cost are independent of one another. We accordingly simplified the parameter space such that a single trialwise parameter  $value_t$  would account for both dimensions of value, adjusted by an evolving estimation of the opportunity cost at the time of each choice.

$value$  for a given trial  $t$  was defined as:

$$value_t = reward_t - \theta_t$$

Eq [1]

Where  $reward_t$  is the reward of the offer on trial  $t$  and  $\theta_t$  is the opportunity cost of capturing offer  $t$ , computed as:

$$\theta_t = delay_t * \mu_t$$

Eq [2]

Where  $\mu_t$  is the average rate of reward captured per second through to the beginning of trial  $t$ , i.e.:

$$\mu_t = \frac{\sum_{j=1}^{t-1} r_j c_j}{s_{t-1}}$$

Eq [3]



where  $c_j$  is a discrete variable reflecting the selection for trial  $j$  (1 = capture, 0 = release) and  $s_{t-1}$  is the time in seconds at the end of the feedback of trial  $t - 1$  (relative to opening frame of the first trial of the experiment).

Accordingly, *value* approaching positive  $\infty$  reflect offers that exceed the opportunity cost of the current moment, and should readily be captured, while *value* approaching negative  $\infty$  describe readily avoidable offers where the reward harvested in exchange for the absorbed time cost is not justified at that moment. In choice models, this relationship is reflected by a positive coefficient, i.e., higher choice probability follows higher *value*.

We then ran a single model of  $choice_t$  (capture, release) as a function of three two-way interaction effects:  $PEP_t * value_t$ ,  $HF_t * value_t$  and  $HR_t * value_t$ , in addition to an intercept term, and nuisance coefficients *order* (BD, DP), *env* (boom, downturn) and *trial index*. The model (see Fig. 1E) returned a significantly negative coefficient for the  $PEP * value$  interaction ( $\beta = -.306, s.e. = .134, p = .023$ ), suggesting that increased contractility blunts the positive association between choice and *value*; in other words, sympathetic drive is associated with higher acceptance of offers presenting low value at a given moment. The model also returned a significantly negative coefficient for the  $HF * value$  interaction ( $\beta = -.861, s.e. = .130, p < .001$ ), which also describes a blunting of the *value* coefficient when HF power increased; in other words, parasympathetic drive is also associated with higher acceptance of low value offers at a given moment. The  $HR * value$  interaction also reached statistical significance ( $\beta = .341, s.e. = .144, p = .018$ ), indicating that a slower heart-rate again blunts the positive association between value and capture.

Sympathetic and parasympathetic drive may track with unpleasant decisions, i.e., a specific action associated with an individual offer and its immediate negative consequence. However, mobilization of either of these autonomic branches could also reflect their association with derivatives (perturbations) of rate of reward, i.e., learning the richness of the environment. We consider  $\mu_t$  from Eq [3] a proxy for the evolution of this reward rate. The derivative of  $\mu_t$  with respect to trial  $t$ , i.e.,  $\frac{d\mu}{dt}_t$ , represents trialwise perturbations. We modelled  $\frac{d\mu}{dt}_t$  as a function of  $\frac{dPEP}{dt}_t$ ,  $\frac{dHF}{dt}_t$  and  $\frac{dHR}{dt}_t$ . The model also contained an intercept term and nuisance coefficients *env*, *choice*, *order*, and *trial index*.

This model of  $\frac{d\mu}{dt}$  (see Fig. 1F) returned a significantly negative coefficient for  $\frac{dPEP}{dt}$  ( $\beta = -.006, s.e. = .002, p < .001$ ), indicating countercyclical perturbations in contractility and reward rate – i.e., if the reward rate decreased, contractility would increase, and vice versa. The coefficients for *HF* and *HR* failed to reach statistical significance (both p-values > .591). Perturbations in the reward rate are therefore exclusively associated with sympathetic drive; contractility increases as reward rate reduces. A control model of rectified reward rate derivative, i.e.,  $|\frac{d\mu}{dt}|$ , modelled as a function of  $\frac{dPEP}{dt}_t$ ,  $\frac{dHF}{dt}_t$  and  $\frac{dHR}{dt}_t$  returned no significant physiology coefficients (all p-values > .079), ruling out a more global responsivity of the sympathetic system to reward rate changes in any direction.

Finally, we reran all models in Analysis branch 1 using the raw physiology measures, i.e., not corrected for respiration state using the residualization procedure outlined in the pre-processing section. The pattern of results were the same across all models.

### *Analysis branch 2 - Methods*

The key finding from our analysis so far centres on perturbations in the sympathetic state tracking perturbations in the reward rate. This may reflect a relationship between the sympathetic state and learning, however the objective measure of reward rate used above (the rate of reward harvested per second) is not direct evidence that subjects are learning these perturbations in environment quality. In this branch of analysis, we employ computational models fitted to the choice data, and estimate parameters of the subjective estimate of reward rate, in addition to parameters scaling the learning of perturbations in the reward rate. Recall from the previous section, that  $\mu_t$  represents a moving threshold against which encountered options can be assessed. A simple means by which participants can keep track of  $\mu_t$  (Constantino & Daw, 2015; Hutchinson, Wilke & Todd, 2008; McNamara & Houston, 1985) is to implement an incremental error-driven learning rule (Schultz et al., 1997; Sutton and Barto, 1998) whereby a subjective estimate of  $\mu_t$ , which we will refer to here as  $\rho$  for clarity, is incrementally updated according to recent experience. The optimal policy from the MVT remains the same: capture an option  $i$ , whenever the reward,  $r_i$ , exceeds the opportunity cost of the time taken to pursue the option. As with Eq [2], opportunity cost is calculated as the time,  $delay_i$ , that the option takes to pursue (in seconds) multiplied by the subjective estimated of the reward rate,  $\rho$ .

$$c_i = delay_i * \rho$$

Eq [4]

We will refer to this measure of opportunity cost, using the subjective estimate  $\rho$ , as  $c_i$ . As with the objective measures, participants should capture items that exceed their subjective estimate of the reward rate, i.e., whenever  $r_i \geq \text{delay}_i * \rho$ . Note that we assume quantities  $r_i$  and  $\text{delay}_i$  are known to participants from the outset since they were easily observable and each of the 4 invader identities ( $i = \{1,2,3,4\}$ ) always provided the exact same  $r_i$  and  $\text{delay}_i$ .

We assumed that subjects learn  $\rho$  in units of reward, using a Rescorla-Wagner learning rule (Rescorla and Wagner, 1972; Sutton and Barto, 1998) which is applied at every second ( $s$ ). After each second, their estimate of the reward rate updates according to the following rule:

$$\rho(s+1) = \rho(s) + \alpha * \delta(s)$$

Eq [5]

Here,  $\delta(s)$  is a prediction error, calculated as:

$$\delta(s) = r(s) - \rho(s)$$

Eq [6]

where  $r(s)$  is the reward obtained.  $r(s)$  will either be 0 (for every second in which no reward is obtained, i.e. during approach time, capture time and timeouts from missed responses) or equal to  $r_i$  (following receipt of the reward from captured option  $i$ ).

The learning rate  $\alpha$  acts as a scaling parameter and governs how much participants change their estimate of the reward rate ( $\rho$ ) from one second to the next. Accordingly,  $\rho$  increases when  $r(s)$  is positive (i.e. when a reward is obtained) and decreases every second that elapses without a reward.

*Symmetric and Asymmetric Models.* We first implemented two versions of this reinforcement learning model, used previously to test for the presence of learning asymmetries in this task (Garrett & Daw, 2019). A *Symmetric Model*, with only a single  $\alpha$  and a modified version, an *Asymmetric Model*, which had two  $\alpha$ :  $\alpha^+$  and  $\alpha^-$ . In this second model, updates to  $\rho$  apply as follows:

$$\rho(s+1) = \rho(s) + \begin{cases} \alpha^+ * \delta(s) & (\text{if } r(s) > 0) \\ \alpha^- * \delta(s) & (\text{if } r(s) < 0) \end{cases}$$

Eq [7]

This second model allows updates to occur differently according to whether a reward is received or not. We refer to the mean difference in learning rates as the *learning bias* ( $\alpha^+ - \alpha^-$ ). A positive learning bias ( $\alpha^+ > \alpha^-$ ) indicates that participants adjust their estimates of the reward rate to a greater extent when a reward is obtained compared to when rewards are absent. The converse is true when the learning bias is negative ( $\alpha^+ < \alpha^-$ ). If there is no learning bias ( $\alpha^+ = \alpha^-$ ) then this model is equivalent to the simpler Symmetric Model with a single  $\alpha$ .

*Asymmetric Models with physiology.* Next, we extended the Asymmetry Model described above to test whether learning from positive ( $\alpha^+$ ) or negative ( $\alpha^-$ ) information was modulated by trial to trial perturbations in the physiological state. For each physiological state (i.e., HR, PEP and HF) we compared two separate models (i.e., six models were fitted in total).

For each physiological state, the first model (Asymmetry Phys  $\alpha^+$ ) tested physiological modulation of the  $\alpha^+$  parameter. In this model,  $\alpha^+$  was adjusted at each moment in time, according to the participants physiological state on that trial:

$$\alpha^+(s) = b_0 + b_1 * phys(t)$$

Eq [8]

Here,  $t$  indexes the current trial.  $b_1$  governs the extent to which the learning rate for positive information ( $\alpha^+$ ) is adjusted by the trialwise measure of the physiological state.  $\alpha^-$  was unmodulated by physiological state in this model.

The second of these additional models (Asymmetry Phys  $\alpha^-$ ) tested physiological modulation of the  $\alpha^-$  parameter. This was setup exactly as for Asymmetry Phys  $\alpha^+$ , except  $\alpha^-$  was adjusted on each trial, according to:

$$\alpha^-(s) = b_0 + b_1 * phys(t)$$

Eq [9]

Here,  $b_1$  governs the extent to which the learning rate for negative information ( $\alpha^-$ ) is adjusted on each trial.  $\alpha^+$  was unmodulated by physiological state in this model.

In all models, the probability of capturing an item is estimated using a softmax choice rule, implemented at the final frame of the encounter screen as follows:

$$P(\text{capture}) = \frac{1}{1 + \exp(\beta_0 - \beta_1(r_i - c_i))}$$

Eq [10]

This formulation frames the decision to accept an option as a stochastic decision rule in which participants (noisily) choose between two actions (capture/release) according to value of each action. The temperature parameter  $\beta_1$  governs participants' sensitivity to the difference between these two values whilst the bias term  $\beta_0$  captures a participant's general tendency toward capture/release options (independent of the values of each action). Note that under the above formulation, negative values for  $\beta_0$  indicate a bias towards capturing options, positive values indicate a bias towards releasing options.

In each model,  $\rho$  was initialized at the beginning of the experiment to the arithmetic average reward rate across the experiment, but subsequently carried over between environments (Constantino & Daw, 2015; Garrett & Daw, 2019). For each participant, we estimated the free parameters of the model by maximizing the likelihood of their sequence of choices, jointly with group-level distributions over the entire population using an Expectation Maximization (EM) procedure (Huys et al., 2011) implemented in the Julia language (Bezanson, Karpinski, Shah, & Edelman, 2012)

version 0.7.0. Models were compared by first computing unbiased marginal likelihoods for each subject via subject-level cross validation and then comparing these likelihoods between models (Asymmetric versus Symmetric) using paired sample ttests.

To formally test for differences in learning rates ( $\alpha^+$ ,  $\alpha^-$ ) we estimated the covariance matrix  $\hat{\Sigma}$  over the group level parameters using the Hessian of the model likelihood (Oakes, 1999) and then used a contrast  $c^T \hat{\Sigma} c$  to compute the standard error on the difference  $\alpha^+ - \alpha^-$ .

### *Analysis branch 2 – Results*

A key feature of the learning previously observed in this task (Garrett & Daw, 2019) is that individuals adjusted their subjective estimates of the reward rate to a greater degree when the update was in a positive compared to negative direction. This *learning asymmetry* accounted for the order effect whereby participants changed capture rates between environments to a greater degree when richness improved (participants transitioned from downturn to boom) compared to when richness deteriorated (participants transitioned from boom to downturn), an effect we also observe here (see Fig. 1D).

First, we tested if the same learning asymmetry was present in our data by fitting choices to two reinforcement learning models (Sutton & Barto, 1998): a *Symmetric Model* and an *Asymmetric Model*, exactly as done previously (Garrett & Daw, 2019). Both models used a delta-rule running average (Rescorla & Wagner, 1972) to update  $\rho$  according to positive and negative prediction errors. Negative prediction errors were generated every second that elapsed without a reward (for example, each second of a time delay). Positive prediction errors were generated on seconds



immediately following a time delay when rewards were received. The difference between the Symmetric Model and the Asymmetric Model was whether there were one or two learning rate parameters. The Symmetric Model contained just a single learning parameter,  $\alpha$ . This meant that  $\rho$  updated at the same rate regardless of whether the update was in a positive or a negative direction. The Asymmetric Model had two learning parameters:  $\alpha^+$  and  $\alpha^-$ . This enabled  $\rho$  to update at a different rate, according to whether the update was in a positive ( $\alpha^+$ ) or a negative ( $\alpha^-$ ) direction.

Replicating past findings (Garrett & Daw, 2019), the Asymmetric Model again provided a superior fit (see Table 1) to the choice data than the Symmetric Model ( $t(19) = 3.14, p = .005$ , paired sample ttests comparing Leave One Out cross validation scores for the Asymmetry versus the Symmetric Model) with information integration again being biased in a positive direction ( $\alpha^+ > \alpha^-: z = 1.80, p < 0.05$  one-tailed). Prediction errors that caused  $\rho$  to shift upwards (following receipt of a reward) had a greater impact than prediction errors that caused  $\rho$  to shift downwards (following the absence of a reward).

### *Table 1*

Next, we looked to relate our fine-grained trialwise measures of participants physiological state to learning from positive ( $\alpha^+$ ) and negative ( $\alpha^-$ ) prediction errors. To do this, we tested two further models: (1) Asymmetry Phys  $\alpha^+$ ; (2) Asymmetry Phys  $\alpha^-$ , separately for HR, PEP and HF. Each model respectively allowed  $\alpha^+$  or  $\alpha^-$  to change trial as a function of participants trial to trial physiological state (see analysis branch 2 methods). Results are summarized in Table 2; in the case

of HF HRV, we observed evidence that learning from both positive ( $\alpha^+$ ) and negative ( $\alpha^-$ ) prediction errors was modulated by the physiological state (both p-values below .040; paired sample ttests comparing both Asymmetry HF models versus Asymmetry model). The direction of the effect in both of these models was such that when HF HRV was increased, learning was reduced, i.e.,  $\rho$  shifted upwards more slowly following reward, or downward more slowly following absence of reward. In the case of HR, we observed no evidence that learning from either prediction error was modulated by the physiological state (both p-values above .222). Finally, for PEP, we did not find evidence that learning from positive prediction errors ( $\alpha^+$ ) was modulated by its state ( $p = .135$ ), however we did find evidence that learning from negative prediction errors ( $\alpha^-$ ) was modulated ( $t(19) = 2.18, p = 0.042$ ; paired sample ttests comparing both Asymmetry PEP models versus Asymmetry model). The direction of the effect in this model was such that negative prediction errors that caused  $\rho$  to shift downwards (following the absence of a reward) changed beliefs to a greater extent when sympathetic drive was high (shorter PEP). In other words, participants were faster to learn that their environment was deteriorating when the sympathetic branch of the autonomic state was heightened.

### *Analysis branch 3 - Methods*

Our analyses to this point reveal that perturbations in the reward rate are exclusively associated with changes in sympathetic tone, and that sympathetic activation increases learning symmetry between positive and negative information. We might accordingly expect sympathetic engagement to predict optimal performance in the prey selection task. Here we formalise optimal performance ( $D - B Mid$ ) for each subject as the delta in the rate of mid-rank capture in the downturn environment, relative to the boom environment:

$$D - B \text{ Mid} = p(\{2,3\})_{\text{downturn}} - p(\{2,3\})_{\text{boom}}$$

Eq [11]

Where  $p(X)_S$  is the proportion of items in vector  $X$  captured in environment  $S$ . Higher positive  $D - B \text{ Mid}$  values accordingly reflect more optimal prey selection in the downturn environment, which predicts better task performance. We also computed a similar downturn-boom delta value for each subject for each physiological environment:

$$\begin{aligned} D - B \text{ Drive}_{HR} &= \frac{\sum_{t=k}^q HR(t)}{q}_{\text{downturn}} - \frac{\sum_{t=k}^q HR(t)}{q}_{\text{boom}} \\ D - B \text{ Drive}_{PEP} &= \frac{\sum_{t=k}^q PEP(t)}{q}_{\text{downturn}} - \frac{\sum_{t=k}^q PEP(t)}{q}_{\text{boom}} \\ D - B \text{ Drive}_{HF} &= \frac{\sum_{t=k}^q HF(t)}{q}_{\text{downturn}} - \frac{\sum_{t=k}^q HF(t)}{q}_{\text{boom}} \end{aligned}$$

Eq [12(a-c)]

whereby each  $D - B \text{ Drive}$  corresponds to the downturn-boom delta between the average of each trialwise physiological state from trial  $k$  to  $q$ . Higher positive values reflect higher drive (i.e. increased contractility, increased HF power and increased HR) in the downturn environment. We probed the relationship between our assay of optimal performance and environment-wise physiology fluctuations with a linear model of each subject's  $D - B \text{ Mid}$  as a function of an intercept, and their  $D - B \text{ Drive}_{HR}$ ,  $D - B \text{ Drive}_{PEP}$  and  $D - B \text{ Drive}_{HF}$  values. Further, we ran two iterations of this model, one from the trialwise measures taken from trials in the first half (i.e.

0-360s) of the time spent in each environment (where we assumed the majority of learning is required) and as a control, another model using trials in the second half (360-720s) of the time spent in each state. In other words, in Eq [12(a-c)], for the first model  $k$  was always 1 and  $q$  was the last trial for each subject that started before 360s. For the second model,  $k$  was the first trial that started after 360s, and  $q$  was the subject's final trial. Positive coefficients associate the engagement of the relevant physiological state with optimised learning.

### *Analysis branch 3 - Results*

The linear model (see Fig. 1G) of  $D - B \text{ Mid}$ , as a function of the  $D - B \text{ Drive}$  value for each physiological state, estimated from trials in the first half (early) of each reward state returned a significant positive coefficient for  $D - B \text{ Drive}_{PEP}$  ( $\beta = .035, s.e. = .016, p = .046$ ), with neither coefficient for  $D - B \text{ Drive}_{HR}$  nor  $D - B \text{ Drive}_{HF}$  reaching statistical significance (both p-values  $> .569$ ). The model of  $D - B \text{ Mid}$  using physiological  $D - B \text{ Drive}$  values estimated from trials in the second half (late) of reward states did not return any significant coefficients (all p-values  $> .134$ ). These final models suggest that the sympathetic engagement during crucial learning periods of a low reward environment predicts optimal behavioural adjustment.

## Discussion

Appraising sequential offers of reward relative to an unknown future opportunity and a time cost requires an optimization policy that draws on a belief about the richness characteristics of the current environment. Across a range of experiments, including reinforcement-learning tasks, belief updating paradigms and prey selection, information integration shows a positive bias (Eil & Rao, 2011; Garrett & Sharot, 2014, 2017; Garrett, González-Garzón, Foulkes, Levita & Sharot, 2018; Garrett et al., 2014; Korn, Prehn, Park, Walter, & Heekeren, 2012; Kuzmanovic and Rigoux, 2017; Kuzmanovic, Jefferson & Vogeley, 2015, 2016; Lefebvre et al., 2017; Garrett & Daw, 2019). That is, the rate at which humans update their belief about a probability, association or reward rate is more sluggish if the new information carries a negative or aversive valence or telegraphs a deterioration of the current belief. In our prey selection task, subjects updated their belief about the rate of harvested reward with a similar bias toward reward over delay information. However, using simultaneous continuously recorded cardiac autonomic physiology measures, we reveal a uniquely adaptive role for the sympathetic branch in this situation.

In our choice models (analysis 1), activation in both branches of the autonomic state blunted the positive association between value and choice, whether or not the immediate context was factored into the value of the offer, i.e., whether cost reflected the objective capture-time of an invader and reward reflected the objective harvested fuel, or whether these value dimensions were collapsed into a single variable that compared reward to the opportunity cost of capture in the current reward context. However, we observed contextual derivatives, i.e., changes in the rate of harvested reward, having a unique association with sympathetic over parasympathetic state derivatives.

Specifically, increases in contractility (shorter PEP) scaled with decreases in the average rate of reward harvested per second. No relationship emerged between contractility changes and absolute fluctuations in the environment's richness, dissociating sympathetic drive from a more global richness-monitoring role that tracks outright contextual changes regardless of direction or valence. In our learning models (analysis 2), drive in the sympathetic system uniquely increased the rate of learning, and specifically when reward rate estimates were updated via negative prediction error. In contrast, parasympathetic drive aligned with decreased learning rates from both positive and negative prediction error. Finally, in analysis 3, we revealed that the unique deterioration specific relationship between sympathetic drive and learning was not exclusively a phenomenological response to a worsening environment, by observing a positive relationship between activation of the sympathetic state during crucial periods of the task – i.e., early in the downturn environment – and the deployment of optimal behavioural policy – i.e., increased capture of mid rank invaders.

The only other study (Lenow et al., 2017) to probe the stress system in a human foraging task demonstrated an opposing relationship whereby stress increased overharvesting. Overharvesting occurs when an animal or human exploits proximal known resources beyond a threshold determining that better yields would be obtained by switching location. Such maladaptive perseveration indicates a biased low estimation of environmental quality. That this tendency is exacerbated by stress is interestingly both consistent and at odds with our finding that sympathetic stress adaptively increases the rate of negative information integration. Consistent, in so far as stress drives a pessimistic learning style in both cases, but at odds in terms of adaptivity. It could be the case that stress simply plays a general role in driving more pessimistic foraging behaviour and whether or not this proves adaptive is an arbitrary consequence of task design. However it's

important to also note that Lenow et al (2017) assayed the hypothalamic-pituitary-adrenal axis of the stress response (HPA) via cortisol. Some studies show alignment between the sympathetic system and the HPA response to stressors (e.g., Bosch et al., 2009), others demonstrate task selectivity, particularly where subjects feel threat or a loss of control (see Dickerson and Kemeny (2004) for review) and others still argue a sequential framework that sees HPA respond once a threshold level of activation has been reached by the sympathetic system (Cacioppo et al., 1995; Bosch et al., 2009).

The unique reactivity of the sympathetic branch of the autonomic system for learning that the rate of reward is deteriorating is consistent with division specific neural control of autonomic function. Meta-analysis of human neuroimaging data demonstrate that divergent brain networks regulate the sympathetic and parasympathetic branch, with control of the former including prefrontal and insular cortices, in addition to multiple areas within the medial wall of the mid and anterior cingulate (ACC; Beissner, Meissner, Bär, & Napadow, 2013; Dum, Levinthal & Strick, 2016). Further, animal tracer evidence (Dum et al., 2016) reveals direct synaptic inputs into the adrenal medulla - a key sympathetic site for catecholaminergic release - from both pregenual and subgenual portions of ACC. The specific mobilization of the sympathetic branch when the reward rate is deteriorating may offer a support mechanism for involvement of the ACC, a key node in a network associated with value-based decisions, specifically decisions that involve costs or negative affect (Walton et al, 2009, Shackman et al., 2011, Amemori & Graybiel, 2012). ACC has also been implicated amongst other prefrontal sites in tracking reward history (Seo, Barraclough & Dee, 2007; Bernacchia, Seo, Lee & Wang, 2011). This would align with previous neurophysiological work in human learning, which implicates heightened stress states – assayed

via electrodermal activity - with closer trialwise tracking of adjustments in information integration (Li et al., 2011), with selective stress-driven sensitivity increases to negative prediction errors, eradicating positive learning biases that emerge under calm conditions when stress levels are normal (Garrett et al., 2018).

A curious finding emerged in our initial choice models, where drive in both sympathetic and parasympathetic branches was associated with low value capture; curious given the antagonistic manner in which the two branches of the autonomic state typically respond, e.g., a stressor will induce increased contractility of the heart and decreased vagal tone. This parallel activation could therefore reflect the two autonomic branches serving different functions in the prey selection task via different time constants. As predicted by MVT, and as evidenced by increases in mid-rank invader captures, the downturn reward state increased the subjective value of lower value items. Thus, having learned of a deteriorated environmental richness (associated with increased sympathetic activation), subjects now require a change in behaviour policy. In other words, subjects must overwrite the prepotent policy of avoiding mid-rank invaders, and switch to a policy of capturing them. Parasympathetic drive may therefore signal increased executive control requirements. Neurovisceral integration models of cognitive control (Thayer, Hansen, Saus-Rose & Johnsen, 2009) would support this interpretation. Under this model, prefrontal-subcortical inhibitory circuits that govern the control of thoughts and goal-directed behaviour provide inhibitory input to the heart via the vagus nerve (Benarroch, 1993; Ellis and Thayer, 2010). Later studies supported this model by demonstrating participants with higher resting state HF HRV perform better on task switching (Colzato, Jongkees, de Wit, van der Molen & Steenbergen, 2018), supporting the idea that vagal tone is important for adaptive responses to environmental demands



(Thayer & Lane, 2000). Human meta-analytic imaging data also support a vagal role in supporting behavioural adaptation; sympathetic neural sites are more associated with paradigms involving cognitive stress, while parasympathetic neural sites contribute where tasks involve somatosensory-motor performance (Beissner et al., 2013). While no evidence exists in humans for such parallel autonomic drive, examples exist in the animal literature, such as parallel sympathetic and vagal outflow during the freeze response to conditioned fearful stimuli (Carrive, 2006).

However, it's important to note that an alternative to this parallel processing framework is that the shorter PEP associated with low value capture was not driven by sympathetic drive, but was instead a downstream consequence of a dominant parasympathetic engagement. This interpretation is supported by the additional association we observed between decreased heart-rate and low value capture. Heart-rate can link the concurrent sympathetic and parasympathetic associations via the Frank-Starling mechanism, whereby a beat to beat deceleration in heart rate, which increases the preload, i.e., ventricular filling, causes increased contractility (shorter PEP) for reasons not mediated by the sympathetic system (Sherwood et al., 1990; Kuipers et al., 2017). In other words, capture of low value may be predominantly associated with increased vagal tone, which transiently slows the heart-rate, which in turn increases PEP via increased preload. Such an autonomic cascade would align with the directions we observed in the coefficients relating the physiology variables and value in our choice models.

Ultimately, we can only speculate at this point with regard to the precise roles of the parasympathetic and sympathetic branch in making low value choices, and an aim for future research should be tasks that manipulate both learning and executive demands while recording

simultaneous measures of both branches of the autonomic state. It's nonetheless important to clarify that the Frank-Starling effect does not apply to the primary association revealed by our learning models, models of reward rate derivatives, and model of choice optimization, all of which did not show concurrent influence of heart rate with other autonomic responses, and all of which point to the sympathetic system being uniquely involved in tracking deteriorations in reward rate, and that sympathetic drive during crucial learning windows is uniquely associated with optimal behavioural adaptation in the prey selection task.

Cannon originally proposed that the body readies itself for a 'fight or flight' via secretions of the adrenal medulla, initiated by sympathetic neural projections from the thoracic spine. Our findings offer a potential parcellation of the modulatory role of the autonomic system in context specific decisions - sympathetic support of learning environmental deterioration, and, possibly, parasympathetic support of behaviour modification.

## **Acknowledgements**

The research was supported by award #W911NF-16-1-0474 from the Army Research Office and by the Institute for Collaborative Biotechnologies under Cooperative Agreement W911NF-19-2-0026 with the Army Research Office. Authors are indebted to Tom Bullock and Alexandra Stump for technical assistance and data collection.

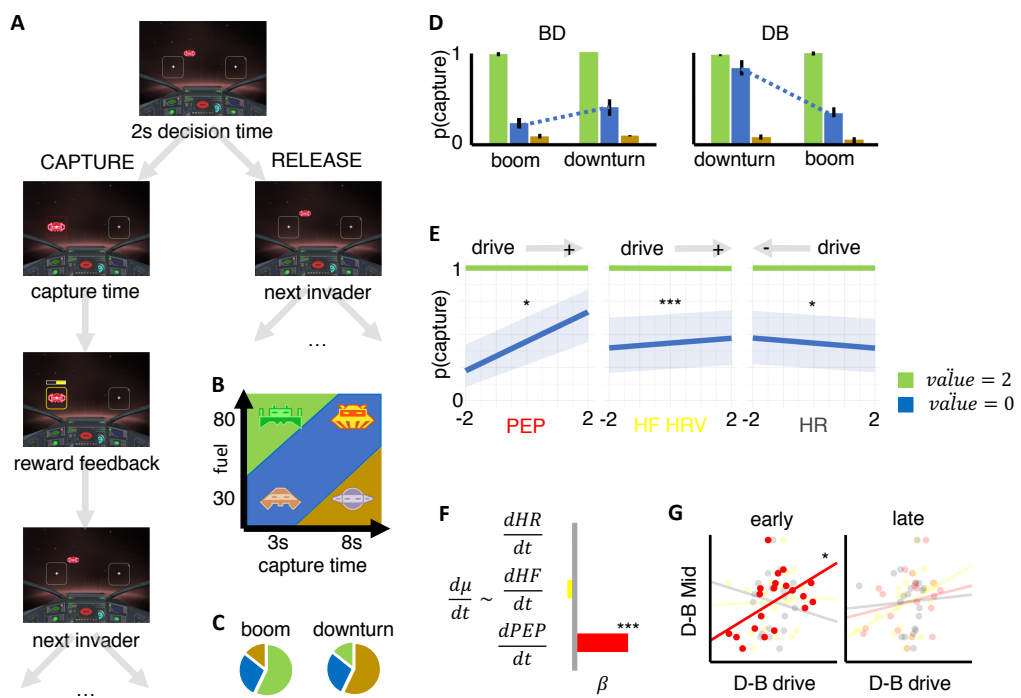

**Figure 1**

## Figure Legends

**Figure 1:** Panel A-C: Paradigm overview. Subjects decide whether to capture or release serially approaching invaders during their two-second approach to the cockpit. Releasing an invader progresses immediately to the next invader, while capturing the invader incurs a capture time cost, and fuel reward. Four invader identities (panel B) map onto a two-by-two reward-by-cost value space, and can be described categorically as hi (green), mid (blue), or low (brown) profitability. Subjects foraged for twelve minutes in each of two reward states (panel C) with different proportions of invader profitability. Panel D: Replication of Garret and Daw (2019) learning asymmetry. Order of foraging (boom – downturn, BD; downturn – boom, DB) predicts optimal behavior (higher rank 3 captures in downturn relative to boom state). Learning deterioration of a reward state takes longer than learning state improvement. Error bars illustrate the standard error of the mean across subjects. Panel E: Relationship between autonomic states, value and capture. From a single model (see analysis branch 2) a series of significant two-way interactions is described where increased contractility (lower pep) and increased vagal tone (higher HF HRV) are both associated with increased capture of lower value (blue line) offers. In contrast, increased low value capture is associated with decreased heart-rate (HR). Here, value is described as in equation 1, i.e., reward relative to opportunity cost in current objective reward state. As a guide, grey arrows above the plot describe whether increased capture for low value is associated with increased (+) or decreased (-) drive within the respective autonomic state. Panel F: PEP tracks deterioration in reward state. Only trialwise changes in PEP ( $\frac{dPEP}{dt}$ ) significantly predicted trialwise changes in reward state ( $\frac{d\mu}{dt}$ ), positive coefficient indicates that decreases to the reward state, i.e., deterioration, increased contractility (shorter PEP). Panel G: PEP predicts optimal learning.

Blockwise changes in percentage of rank 3 captures (downturn – boom) modeled as a function of blockwise changes in PEP (red), HF (yellow) and HR (grey); separately for mean physiological changes in the early portion (0 – 360s) and later (360-720s) of blocks. Optimal performance (higher D-B rank 3 score) predicted by higher relative drive in early downturn state, relative to early boom, only for PEP.  $*p<0.05$ ;  $***p<0.001$

**Table 1: model fitting and parameters**

| Model           | LOOCV     | $\alpha$                          | $\alpha+$                            | $\alpha-$                            | $\beta_0$                         | $\beta_1$                        |
|-----------------|-----------|-----------------------------------|--------------------------------------|--------------------------------------|-----------------------------------|----------------------------------|
| Symmetry Model  | 1230.54   | -2.49<br>[95% CI:<br>$\pm 0.54$ ] |                                      |                                      | 1.80<br>[95% CI:<br>$\pm 0.66$ ]  | 0.15<br>[95% CI:<br>$\pm 0.05$ ] |
| Asymmetry Model | 1076.02** | -                                 | -2.17<br>[95%<br>CI:<br>$\pm 0.38$ ] | -2.38<br>[95%<br>CI:<br>$\pm 0.49$ ] | -0.15<br>[95% CI:<br>$\pm 1.79$ ] | 0.13<br>[95% CI:<br>$\pm 0.03$ ] |

**Table 1:** model fitting and parameters for Symmetry and Asymmetry Models. The table summarizes for each model its fitting performances and its average parameters: LOOCV: leave one out cross validation scores, summed over participants;  $\alpha$ : learning rate for both positive and negative prediction errors (Symmetric Model);  $\alpha+$ : learning rate for positive prediction errors;  $\alpha-$ : average learning rate for negative prediction errors (Asymmetric Model);  $\beta_0$ : softmax intercept (bias towards reject);  $\beta_1$ : softmax slope (sensitivity to the difference in the value of rejecting versus the value of accepting an option). Data are expressed as mean and 95% confidence intervals (calculated as  $1.96 \times \text{standard error}$ ). Note: learning rates displayed here ( $\alpha$ ,  $\alpha+$  and  $\alpha-$ ) are untransformed parameters from the model fitting procedure; the function  $0.5 + 0.5 \times \text{erf}(\alpha/\sqrt{2})$  is subsequently applied to transform these to conventional learning rates within the range 0 to 1.

**\*\*** $p < 0.01$  comparing LOOCV scores between the two models, paired sample ttest

| Model                        | LOOCV    | $\alpha+$                        | Intercept<br>( $\alpha+$ )       | w( $\alpha+$ )                    | $\alpha-$                        | Intercept<br>t ( $\alpha-$ )     | w( $\alpha-$ )                    | $\beta_0$                        | $\beta_1$                       |
|------------------------------|----------|----------------------------------|----------------------------------|-----------------------------------|----------------------------------|----------------------------------|-----------------------------------|----------------------------------|---------------------------------|
| PEP<br>Modulate<br>$\alpha+$ | 1023.63  |                                  | -2.60<br>[95% CI:<br>$\pm 1.23]$ | 0.002<br>[95% CI:<br>$\pm 0.02]$  | -2.67<br>[95% CI:<br>$\pm 0.40]$ |                                  |                                   | -0.19<br>[95% CI:<br>$\pm 1.88]$ | 0.13<br>[95% CI:<br>$\pm 0.03]$ |
| PEP<br>Modulate<br>$\alpha-$ | 1008.02* | -2.41<br>[95% CI:<br>$\pm 0.21]$ |                                  |                                   |                                  | -2.11<br>[95% CI:<br>$\pm 1.05]$ | -0.007<br>[95% CI:<br>$\pm 0.01]$ | -0.30<br>[95% CI:<br>$\pm 1.83]$ | 0.14<br>[95% CI:<br>$\pm 0.03]$ |
| HF<br>Modulate<br>$\alpha+$  | 989.07*  |                                  | -2.44<br>[95% CI:<br>$\pm 0.27]$ | -0.014<br>[95% CI:<br>$\pm 0.06]$ | -2.69<br>[95% CI:<br>$\pm 0.33]$ |                                  |                                   | -0.71<br>[95% CI:<br>$\pm 2.12]$ | 0.14<br>[95% CI:<br>$\pm 0.03]$ |
| HF<br>Modulate<br>$\alpha-$  | 993.60*  | -2.39<br>[95% CI:<br>$\pm 0.27]$ |                                  |                                   |                                  | -2.04<br>[95% CI:<br>$\pm 0.51]$ | -0.09<br>[95% CI:<br>$\pm 0.05]$  | 0.13<br>[95% CI:<br>$\pm 1.91]$  | 0.15<br>[95% CI:<br>$\pm 0.04]$ |
| HR<br>Modulate<br>$\alpha+$  | 1031.42  |                                  | -2.05<br>[95% CI:<br>$\pm 0.96]$ | -0.49<br>[95% CI:<br>$\pm 1.25]$  | -2.71<br>[95% CI:<br>$\pm 0.34]$ |                                  |                                   | -0.22<br>[95% CI:<br>$\pm 1.79]$ | 0.13<br>[95% CI:<br>$\pm 0.04]$ |
| HR<br>Modulate<br>$\alpha-$  | 1082.25  | -2.14<br>[95% CI:<br>$\pm 0.34]$ |                                  |                                   |                                  | -1.50<br>[95% CI:<br>$\pm 0.83]$ | -1.09<br>[95% CI:<br>$\pm 1.31]$  | -0.33<br>[95% CI:<br>$\pm 1.97]$ | 0.13<br>[95% CI:<br>$\pm 0.03]$ |

**Table 2:** model fitting and parameters for physiology modulated learning models. Each model allows either  $\alpha+$  or  $\alpha-$  (untransformed) to be modulated on a trial by trial (t) basis according to one of the physiological readouts (PEP, HF or HR) according to an intercept and a slope (e.g.,  $\alpha+(t) = \text{intercept} + w * \text{PEP}(t)$ ). A transfer function  $[0.5 + 0.5 * \text{erf}(\alpha / \sqrt{2})]$  is then used to convert this to a conventional learning rate. The alternate learning rate is not modulated by physiology and is fit



as a single free parameter. The table summarizes for each model its fitting performances and its average parameters: LOOCV: leave one out cross validation scores, summed over participants;  $\alpha_+$ : learning rate for positive prediction errors (untransformed);  $\alpha_-$ : average learning rate for negative prediction errors (untransformed); intercept: unstandardized intercept for regressing learning rate ( $\alpha_+$  or  $\alpha_-$ ) against physiology; w: unstandardized slope for regressing learning rate against physiology;  $\beta_0$ : softmax intercept (bias towards reject);  $\beta_1$ : softmax slope (sensitivity to the difference in the value of rejecting versus the value of accepting an option). Data are expressed as mean and 95% confidence intervals (calculated as  $1.96 \times \text{standard error}$ ).

*\* $p < 0.05$  comparing LOOCV scores against scores for the basic Asymmetry Model which does not include physiology measures (see Table 1), paired sample ttest*

## References

- Amemori, K. I., & Graybiel, A. M. (2012). Localized microstimulation of primate pregenual cingulate cortex induces negative decision-making. *Nature neuroscience*, 15(5), 776.
- Barbieri, R., Matten, E. C., Alabi, A. A., & Brown, E. N. (2005). A point-process model of human heartbeat intervals: new definitions of heart rate and heart rate variability. *American Journal of Physiology-Heart and Circulatory Physiology*, 288(1), H424-H435.
- Bates, D., Mächler, M., Bolker, B., & Walker, S. (2014). Fitting linear mixed-effects models using lme4. *arXiv preprint arXiv:1406.5823*.
- Beissner, F., Meissner, K., Bär, K. J., & Napadow, V. (2013). The autonomic brain: an activation likelihood estimation meta-analysis for central processing of autonomic function. *Journal of Neuroscience*, 33(25), 10503-10511.
- Benarroch, E. E. (1993). The central autonomic network: functional organization, dysfunction, and perspective. In *Mayo Clinic Proceedings* (Vol. 68, No. 10, pp. 988-1001). Elsevier.
- Bernacchia, A., Seo, H., Lee, D., & Wang, X. J. (2011). A reservoir of time constants for memory traces in cortical neurons. *Nature neuroscience*, 14(3), 366.

Bernstein, G. (1986). Surface landmarks for the identification of key anatomic structures of the face and neck. *The Journal of Dermatologic Surgery and Oncology*, 12(7), 722-726.

Berntson, G. G., Lozano, D. L., Chen, Y. J., & Cacioppo, J. T. (2004). Where to Q in PEP. *Psychophysiology*, 41(2), 333-337.

Bezanson, J., Karpinski, S., Shah, V.B., & Edelman, A. (2012). Julia: A Fast Dynamic Language for Technical Computing. ArXiv12095145 Cs.

BIOPAC Systems Inc., Santa Barbara, CA.

Bosch, J. A., De Geus, E. J., Carroll, D., Goedhart, A. D., Anane, L. A., van Zanten, J. J. V., ... & Edwards, K. M. (2009). A general enhancement of autonomic and cortisol responses during social evaluative threat. *Psychosomatic medicine*, 71(8), 877.

Bradley, M. M., Miccoli, L., Escrig, M. A., & Lang, P. J. (2008). The pupil as a measure of emotional arousal and autonomic activation. *Psychophysiology*, 45(4), 602-607.

Brainard, D. H. (1997) The Psychophysics Toolbox, *Spatial Vision* 10:433-436.

Cacioppo, J. T., Malarkey, W. B., Kiecolt-Glaser, J. K., Uchino, B. N., Sgoutas-Emch, S. A., Sheridan, J. F., ... & Glaser, R. (1995). Heterogeneity in neuroendocrine and immune

responses to brief psychological stressors as a function of autonomic cardiac activation. *Psychosomatic medicine*, 57(2), 154-164.

Carrive, P. (2006). Dual activation of cardiac sympathetic and parasympathetic components during conditioned fear to context in the rat. *Clinical and experimental pharmacology and physiology*, 33(12), 1251-1254.

Charnov, E. L. (1976). Optimal foraging, the marginal value theorem.

Chen, Z., Brown, E. N., & Barbieri, R. (2010). Characterizing nonlinear heartbeat dynamics within a point process framework. *IEEE Transactions on Biomedical Engineering*, 57(6), 1335-1347.

Cieslak, M., Ryan, W. S., Babenko, V., Erro, H., Rathbun, Z. M., Meiring, W., ... & Grafton, S. T. (2018). Quantifying rapid changes in cardiovascular state with a moving ensemble average. *Psychophysiology*, 55(4), e13018.

Colzato, L. S., Jongkees, B. J., de Wit, M., van der Molen, M. J., & Steenbergen, L. (2018). Variable heart rate and a flexible mind: Higher resting-state heart rate variability predicts better task-switching. *Cognitive, Affective, & Behavioral Neuroscience*, 18(4), 730-738.

Constantino, S. M., & Daw, N. D. (2015). Learning the opportunity cost of time in a patch-foraging task. *Cognitive, Affective, & Behavioral Neuroscience*, 15(4), 837-853.

Cowie, R. J. (1977). Optimal foraging in great tits (*Parus major*). *Nature*, 268(5616), 137.

Dickerson, S. S., & Kemeny, M. E. (2004). Acute stressors and cortisol responses: a theoretical integration and synthesis of laboratory research. *Psychological bulletin*, 130(3), 355.

Dum, R. P., Levinthal, D. J., & Strick, P. L. (2016). Motor, cognitive, and affective areas of the cerebral cortex influence the adrenal medulla. *Proceedings of the National Academy of Sciences*, 113(35), 9922-9927.

Eil, D., & Rao, J. M. (2011). The good news-bad news effect: asymmetric processing of objective information about yourself. *American Economic Journal: Microeconomics*, 3(2), 114-38.

Ellis, R. J., & Thayer, J. F. (2010). Music and autonomic nervous system (dys) function. *Music Perception: An Interdisciplinary Journal*, 27(4), 317-326.

Garrett, N., & Daw, N. D. (2019). Biased belief updating and suboptimal choice in foraging decisions. *bioRxiv*, 713941.

Garrett, N., & Sharot, T. (2014). How robust is the optimistic update bias for estimating self-risk and population base rates?. *PLoS One*, 9(6), e98848.

Garrett, N., & Sharot, T. (2017). Optimistic update bias holds firm: Three tests of robustness following Shah et al. *Consciousness and cognition*, 50, 12-22.

Garrett, N., González-Garzón, A. M., Foulkes, L., Levita, L., & Sharot, T. (2018). Updating beliefs under perceived threat. *Journal of Neuroscience*, 38(36), 7901-7911.

Garrett, N., Sharot, T., Faulkner, P., Korn, C. W., Roiser, J. P., & Dolan, R. J. (2014). Losing the rose tinted glasses: neural substrates of unbiased belief updating in depression. *Frontiers in human neuroscience*, 8, 639.

Hayden, B. Y., Pearson, J. M., & Platt, M. L. (2011). Neuronal basis of sequential foraging decisions in a patchy environment. *Nature neuroscience*, 14(7), 933.

Hutchinson, J. M., Wilke, A., & Todd, P. M. (2008). Patch leaving in humans: can a generalist adapt its rules to dispersal of items across patches?. *Animal Behaviour*, 75(4), 1331-1349.

Huys, Q.J.M., Cools, R., Gölzer, M., Friedel, E., Heinz, A., Dolan, R.J., & Dayan, P. (2011). Disentangling the roles of approach, activation and valence in instrumental and pavlovian responding. *PLOS Comput. Biol.* 7, e1002028

Joshi, S., Li, Y., Kalwani, R. M., & Gold, J. I. (2016). Relationships between pupil diameter and neuronal activity in the locus coeruleus, colliculi, and cingulate cortex. *Neuron*, 89(1), 221-234.

Kelsey, R. M., Ornduff, S. R., & Alpert, B. S. (2007). Reliability of cardiovascular reactivity to stress: internal consistency. *Psychophysiology*, 44(2), 216-225.

Kelsey, R. M., Reiff, S., Wiens, S., Schneider, T. R., Mezzacappa, E. S., & Guethlein, W. (1998). The ensemble-averaged impedance cardiogram: An evaluation of scoring methods and interrater reliability. *Psychophysiology*, 35(3), 337-340.

Kleiner M, Brainard D, Pelli D, 2007, "What's new in Psychtoolbox-3?" Perception 36 ECVF Abstract Supplement.

Kolling, N., Behrens, T. E., Mars, R. B., & Rushworth, M. F. (2012). Neural mechanisms of foraging. *Science*, 336(6077), 95-98.

Korn, C. W., Prehn, K., Park, S. Q., Walter, H., & Heekeren, H. R. (2012). Positively biased processing of self-relevant social feedback. *Journal of Neuroscience*, 32(47), 16832-16844.

Krishnamurthy, K., Nassar, M. R., Sarode, S., & Gold, J. I. (2017). Arousal-related adjustments of perceptual biases optimize perception in dynamic environments. *Nature human behaviour*, 1(6), 0107.

Kuipers, M., Richter, M., Scheepers, D., Immink, M. A., Sjak-Shie, E., & van Steenbergen, H. (2017). How effortful is cognitive control? Insights from a novel method measuring single-

trial evoked beta-adrenergic cardiac reactivity. *international Journal of Psychophysiology*, 119, 87-92.

Kuzmanovic, B., & Rigoux, L. (2017). Valence-dependent belief updating: computational validation. *Frontiers in psychology*, 8, 1087.

Kuzmanovic, B., Jefferson, A., & Vogeley, K. (2015). Self-specific Optimism Bias in Belief Updating Is Associated with High Trait Optimism. *Journal of Behavioral Decision Making*, 28(3), 281-293.

Kuzmanovic, B., Jefferson, A., & Vogeley, K. (2016). The role of the neural reward circuitry in self-referential optimistic belief updates. *Neuroimage*, 133, 151-162.

Kuznetsova, A., Brockhoff, P. B., & Christensen, R. H. B. (2017). lmerTest package: tests in linear mixed effects models. *Journal of Statistical Software*, 82(13).

Larsen, P. D., Tzeng, Y. C., Sin, P. Y. W., & Galletly, D. C. (2010). Respiratory sinus arrhythmia in conscious humans during spontaneous respiration. *Respiratory physiology & neurobiology*, 174(1-2), 111-118.

Lefebvre, G., Lebreton, M., Meyniel, F., Bourgeois-Gironde, S., & Palminteri, S. (2017). Behavioural and neural characterization of optimistic reinforcement learning. *Nature Human Behaviour*, 1(4), 0067.



Lenow, J. K., Constantino, S. M., Daw, N. D., & Phelps, E. A. (2017). Chronic and acute stress promote overexploitation in serial decision making. *Journal of Neuroscience*, 37(23), 5681-5689.

Li, J., Schiller, D., Schoenbaum, G., Phelps, E. A., & Daw, N. D. (2011). Differential roles of human striatum and amygdala in associative learning. *Nature neuroscience*, 14(10), 1250.

MATLAB and Statistics Toolbox Release 2018a, The MathWorks, Inc., Natick, Massachusetts, United States.

McNamara, J. M., & Houston, A. I. (1985). Optimal foraging and learning. *Journal of Theoretical Biology*, 117(2), 231-249.

Mezzacappa, E. S., Kelsey, R. M., & Katkin, E. S. (1999). The effects of epinephrine administration on impedance cardiographic measures of cardiovascular function. *International Journal of Psychophysiology*, 31(3), 189-196.

Oakes, D. (1999). Direct calculation of the information matrix via the EM. *Journal of the Royal Statistical Society: Series B (Statistical Methodology)*, 61(2), 479-482.

Pelli, D. G. (1997) The VideoToolbox software for visual psychophysics: Transforming numbers into movies, *Spatial Vision* 10:437-442.

Rescorla, R. A., & Wagner, A. R. (1972). A theory of Pavlovian conditioning: Variations in the effectiveness of reinforcement and nonreinforcement. *Classical conditioning II: Current research and theory*, 2, 64-99.

Richter, M., & Gendolla, G. H. (2009). The heart contracts to reward: Monetary incentives and pre-ejection period. *Psychophysiology*, 46(3), 451-457.

Richter, M., Friedrich, A., & Gendolla, G. H. (2008). Task difficulty effects on cardiac activity. *Psychophysiology*, 45(5), 869-875.

Richter, M., Gendolla, G. H., & Wright, R. A. (2016). Three decades of research on motivational intensity theory: What we have learned about effort and what we still don't know. In *Advances in motivation science* (Vol. 3, pp. 149-186). Elsevier.

Saul, J. P., Berger, R. D., Albrecht, P., Stein, S. P., Chen, M. H., & Cohen, R. (1991). Transfer function analysis of the circulation: unique insights into cardiovascular regulation. *American Journal of Physiology-Heart and Circulatory Physiology*, 261(4), H1231-H1245.

Schultz, W., Dayan, P., & Montague, P. R. (1997). A neural substrate of prediction and reward. *Science*, 275(5306), 1593-1599.

Seo, H., Barraclough, D. J., & Lee, D. (2007). Dynamic signals related to choices and outcomes in the dorsolateral prefrontal cortex. *Cerebral Cortex*, 17(suppl\_1), i110-i117.

Shackman, A. J., Salomons, T. V., Slagter, H. A., Fox, A. S., Winter, J. J., & Davidson, R. J. (2011). The integration of negative affect, pain and cognitive control in the cingulate cortex. *Nature Reviews Neuroscience*, 12(3), 154.

Sherwood, A., Allen, M. T., Fahrenberg, J., Kelsey, R. M., Lovallo, W. R., & Van Doornen, L. J. (1990). Methodological guidelines for impedance cardiography. *Psychophysiology*, 27(1), 1-23.

Sutton, R. S., & Barto, A. G. (1998). *Introduction to reinforcement learning* (Vol. 2, No. 4). Cambridge: MIT press.

Thayer, J. F., & Lane, R. D. (2000). A model of neurovisceral integration in emotion regulation and dysregulation. *Journal of affective disorders*, 61(3), 201-216.

Thayer, J. F., Hansen, A. L., Saus-Rose, E., & Johnsen, B. H. (2009). Heart rate variability, prefrontal neural function, and cognitive performance: the neurovisceral integration perspective on self-regulation, adaptation, and health. *Annals of Behavioral Medicine*, 37(2), 141-153.

Walton, M. E., Groves, J., Jennings, K. A., Croxson, P. L., Sharp, T., Rushworth, M. F., & Bannerman, D. M. (2009). Comparing the role of the anterior cingulate cortex and 6-

hydroxydopamine nucleus accumbens lesions on operant effort-based decision making. *European Journal of Neuroscience*, 29(8), 1678-1691.

Wright, R. A., Killebrew, K., & Pimpalpure, D. (2002). Cardiovascular incentive effects where a challenge is unfixed: Demonstrations involving social evaluation, evaluator status, and monetary reward. *Psychophysiology*, 39(2), 188-197.
